# Supplementary material for: Screening and characterization of endophytic Bacillus and Paenibacillus strains from medicinal plant Lonicera japonica for use as potential plant growth promoters
Source: PubMed Central journal article supplement — Braz J Microbiol. 2015 Dec 1;46(4):977–89. doi: 10.1590/S1517-838246420140024 (PMC4704640; doi:10.1590/s1517-838246420140024), 2015-12-01
Supplement: bjm-46-977-s001.pdf [file bjm-46-977-s001.pdf]

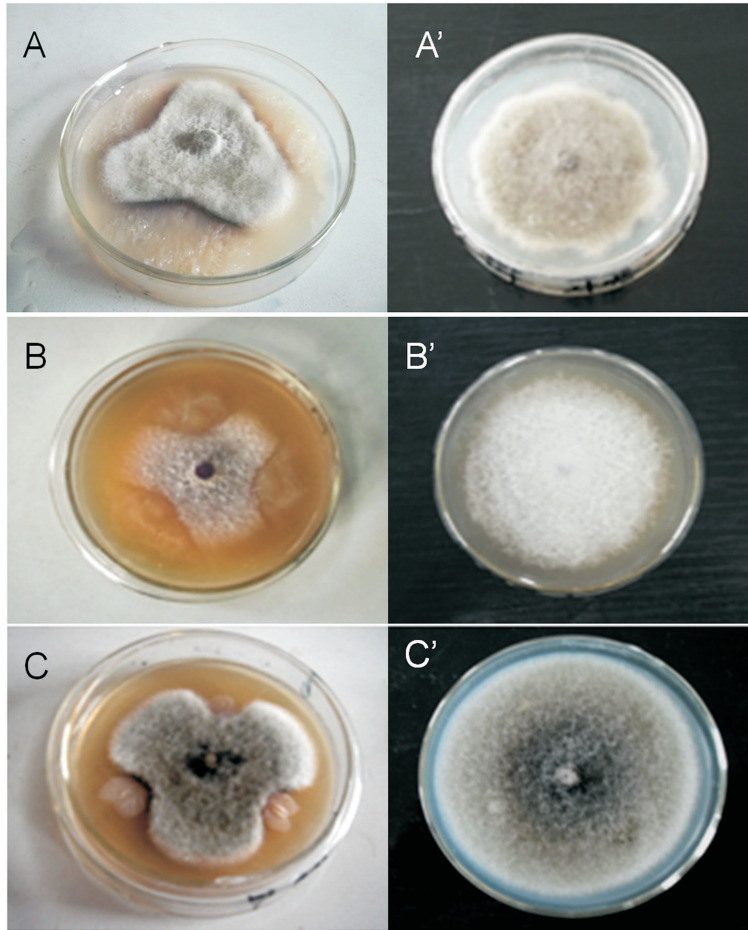

**Figure S1** - Antagonistic activity of endophytes against phytopathogenic fungi after 3 d. (A) Inhibition of *M. grisea* MG01 by endophyte strain 130; (B) inhibition of *F. oxysporum* FO02 by endophyte strain 124; C. inhibition of *A. alternata* AA03 by endophyte strain 132. A', B', and C' were control pathogenic fungus fungal colonies without endophytes.
