# Supplementary material for: Screening and characterization of endophytic Bacillus and Paenibacillus strains from medicinal plant Lonicera japonica for use as potential plant growth promoters
Source: PubMed Central journal article supplement — Braz J Microbiol. 2015 Dec 1;46(4):977–89. doi: 10.1590/S1517-838246420140024 (PMC4704640; doi:10.1590/s1517-838246420140024), 2015-12-01
Supplement: bjm-46-977-s002.pdf [file bjm-46-977-s002.pdf]

Table S1. A Physiological and biochemical test results and cell characteristics of strains 122, 124, 130, 132, 135, and 170.

| Assay items             | 122 | 124 | 130 | 132 | 135 | 170 | Assay items         | 122         | 124         | 130         | 132         | 135         | 170         |
|-------------------------|-----|-----|-----|-----|-----|-----|---------------------|-------------|-------------|-------------|-------------|-------------|-------------|
| Catalase                | +   | +   | +   | +   | +   | +   | 4 °C                | -           | -           | -           | -           | -           | -           |
| V-P test                | +   | -   | -   | +   | +   | +   | 10 °C               | -           | +           | -           | -           | +           | -           |
| D-glucose acid yield    | +   | +   | +   | +   | +   | +   | 30 °C               | +           | +           | +           | +           | +           | +           |
| L-Arab sugar acid yield | +   | -   | +   | +   | -   | +   | 40 °C               | +           | +           | +           | +           | +           | +           |
| D-mannitol              | +   | -   | +   | +   | +   | +   | 50 °C               | -           | -           | -           | -/+         | +           | +           |
| <a href="#">Xylose</a>  | +   | -   | -   | +   | +   | +   | 2% NaCl             | +           | +           | +           | +           | +           | +           |
| Starch                  | +   | +   | -   | +   | +   | +   | 5% NaCl             | +           | +           | +           | +           | +           | +           |
| Phenylalanine deaminase | +   | +   | -   | +   | -   | +   | 7% NaCl             | +           | +           | +           | +           | +           | +           |
| Yolk phospholipase      | +   | +   | +   | +   | -   | -   | 10% NaCl            | +           | -           | -           | -/+         | +           | -           |
| Nitrate reductase       | +   | -   | +   | -   | +   | -   | Gram stain          | +           | +           | +           | +           | +           | +           |
| Casein decomposition    | -   | -   | +   | +   | +   | +   | Spore               | +           | +           | +           | +           | +           | +           |
| Citrate utilization     | -   | +   | -   | +   | +   | +   | Bacterial size (µm) | 1.07 x 2.43 | 0.41 x 1.38 | 0.57 x 1.09 | 0.89 x 2.49 | 0.94 x 2.42 | 0.39 x 1.57 |
| Broth (pH 5.0)          | +   | -   | +   | +   | +   | +   | Bacterial shape     | Rod         | Rod         | Rod         | Rod         | Slim rod    | Rod         |

Note: +, 90% or more of strains positive; -, 90% or more of strains negative; -/+, not sure.
